# Supplementary material for: Single-cell atlas of early chick development reveals gradual segregation of neural crest lineage from the neural plate border during neurulation
Source: eLife. 2022 Jan 28;11:e74464. doi: 10.7554/eLife.74464 (PMC8798042; doi:10.7554/eLife.74464)
Supplement: Source data 1. [file elife-74464-supp1.xlsx]

## Sheet: Sheet1
Stage	# embryos	# 10X input cells	# cells/embryo	# cells post CellRanger QC	% cells recovered	# cells post Seurat analysis*	Mean reads per cell	Median genes per cell	Median UMI counts/cell	Total genes	Seqeuncing platform
HH4	8	8000	1000	2398	29.975	2064	144605	1836	6180	15370	NextSeq500
HH5	13	15000	1153.85	6723	44.82	6363	44343	3659	14229	18916	HiSeq2500
HH6	12	10000	833.333	4553	45.53	4294	30466	3396	13309	17828	HiSeq2500
HH7	8	13000	1625	6585	50.6538	4000	20044	2696	8821	17873	HiSeq2500
* cells containing >3500-5000 features (HH4>3500, HH5>5500, HH6>5000, HH7>4000) and <500 features and >0.5% mitochondrial genes were excluded.
